# Supplementary material
Source: PubMed Central journal article supplement (PMC4578003)
Supplement: supp_mcv116_aob-15168-s01.pdf [file supp_mcv116_aob-15168-s01.pdf]

## SUPPLEMENTARY DATA

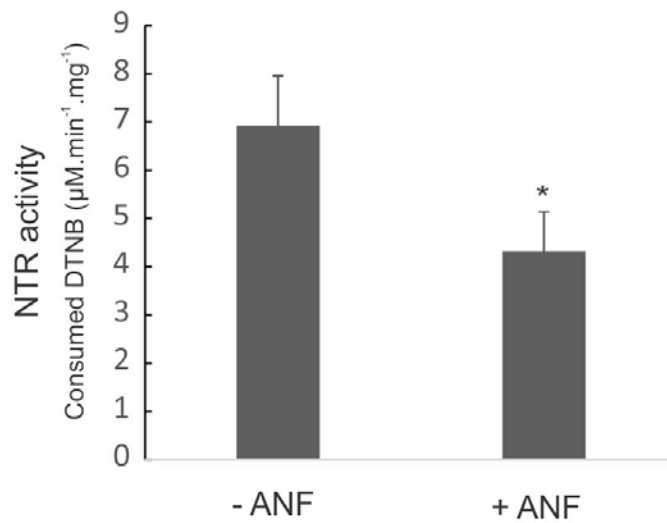

Supplementary Fig. S1. Effect of auranofin (ANF) on thioredoxin reductase (NTR) activity in *Arabidopsis* roots. NTR activity was measured in 100 mM phosphate buffer pH 7.0, 10 mM EDTA and 200  $\mu\text{M}$  NADPH. Reactions were initiated by the addition of 300  $\mu\text{M}$  of the substrate 5,5'-dithiobis(2-nitrobenzoic) acid (DTNB) and followed at 412 nm. For inhibition experiments of NTR activity, samples were incubated with 5  $\mu\text{M}$  ANF for 15 min previous to the measurement of NTR activity. Activity is expressed as  $\mu\text{M}$  DTNB consumed. $\text{min}^{-1}\cdot\text{mg}^{-1}$ . Bars denote SE (n=5). Asterisk indicates a statistical difference respect to control (t-test,  $P < 0.05$ ).

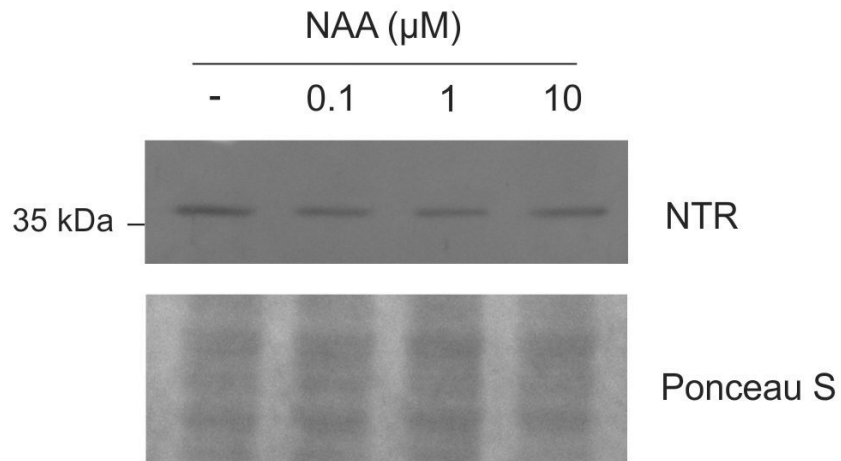

Supplemental Fig. S2. NTR protein levels in auxin-treated roots. Arabidopsis seedlings were treated with different concentrations of the auxin naphthyl acetic acid (NAA) for 1 day. NTR protein levels were analyzed in roots using an anti NTR antibody which recognize NTRA and NTRB isoforms.

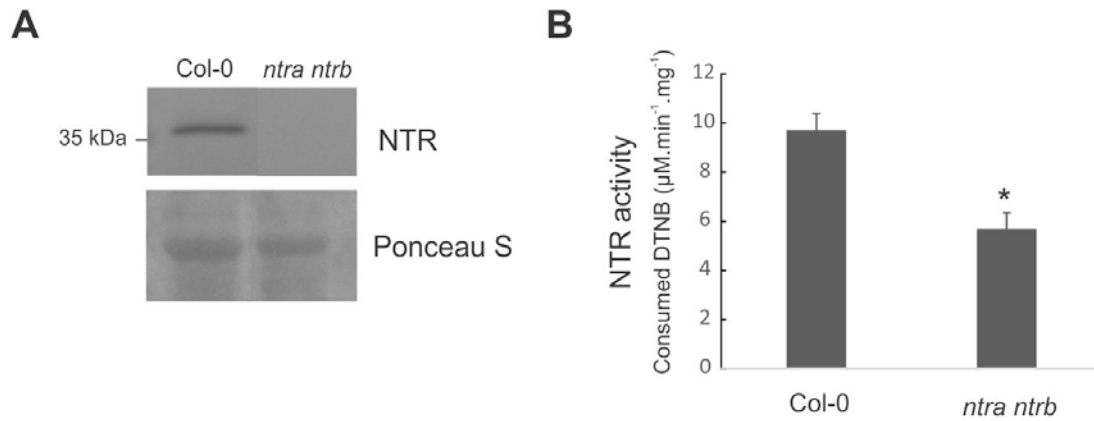

Supplemental Fig. S3: Western blot and NTR activity in *ntra ntrb* mutant. A) Western blot of 7-d old wild type and *ntra ntrb* mutant seedlings using an anti NTR antibody which detects the NTRA and NTRB isoforms. B) Total reductase activity in wild type and *ntra ntrb* seedlings. Activity is expressed as  $\mu\text{M DTNB consumed}\cdot\text{min}^{-1}\cdot\text{mg}^{-1}$ . Bars denote SE (n=3). Asterisk indicates a statistical difference between samples (t-test,  $P < 0.05$ ).
